# Supplementary material
Source: PubMed Central journal article supplement (PMC6071887)

## SUPPLEMENTARY DATA

**Supplementary Table S1. Bonham and Sellers' Racial Attributes of Clinical Evaluation Scale**

| Item no. | Question                                                                                                                  |
|----------|---------------------------------------------------------------------------------------------------------------------------|
| RACE 1   | I consider information from patients about their racial background.                                                       |
| RACE 2   | I consider my patient's race to better understand their genetic predispositions.                                          |
| RACE 3   | I consider my patient's race when making decisions about which medications to prescribe.                                  |
| RACE 4   | I consider my patient's race in determining genetic risk for common, complex diseases (e.g., kidney disease or diabetes). |
| RACE 5   | I consider my patient's race in making medication dosage decisions.                                                       |
| RACE 6   | I consider my patient's race when determining age of initiation of screening for certain diseases.                        |
| RACE 7   | I consider my patient's race in determining how aggressively to treat particular diseases.                                |

Response Items: all of the time; most of the time; some of the time; a little of the time; none of the time. Each item rated on a five-point Likert scale from 0 (none of the time) to 4 (all of the time). Score calculated as sum of responses (0–28), with higher scores signifying greater use of race in clinical practice. The Cronbach's alpha = 0.86.

RACE, Racial Attributes of Clinical Evaluation.

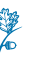

Supplement: Supp_Table1.pdf [file Supp_Table1.pdf]
